# Supplementary material for: De novo identification of CD4+ T cell epitopes
Source: PubMed Central journal article supplement (PMC11093748; doi:10.1038/s41592-024-02255-0), 2024-04-24
Supplement: 41592_2024_2255_MOESM1_ESM.pdf [file 41592_2024_2255_MOESM1_ESM.pdf]

## Reporting Summary

Nature Portfolio wishes to improve the reproducibility of the work that we publish. This form provides structure for consistency and transparency in reporting. For further information on Nature Portfolio policies, see our [Editorial Policies](#) and the [Editorial Policy Checklist](#).

### Statistics

For all statistical analyses, confirm that the following items are present in the figure legend, table legend, main text, or Methods section.

- |                                     |                                                                                                                                                                                                                                                                                                |
|-------------------------------------|------------------------------------------------------------------------------------------------------------------------------------------------------------------------------------------------------------------------------------------------------------------------------------------------|
| n/a                                 | Confirmed                                                                                                                                                                                                                                                                                      |
| <input type="checkbox"/>            | <input checked="" type="checkbox"/> The exact sample size ( $n$ ) for each experimental group/condition, given as a discrete number and unit of measurement                                                                                                                                    |
| <input type="checkbox"/>            | <input checked="" type="checkbox"/> A statement on whether measurements were taken from distinct samples or whether the same sample was measured repeatedly                                                                                                                                    |
| <input type="checkbox"/>            | <input checked="" type="checkbox"/> The statistical test(s) used AND whether they are one- or two-sided<br><i>Only common tests should be described solely by name; describe more complex techniques in the Methods section.</i>                                                               |
| <input checked="" type="checkbox"/> | <input type="checkbox"/> A description of all covariates tested                                                                                                                                                                                                                                |
| <input checked="" type="checkbox"/> | <input type="checkbox"/> A description of any assumptions or corrections, such as tests of normality and adjustment for multiple comparisons                                                                                                                                                   |
| <input type="checkbox"/>            | <input checked="" type="checkbox"/> A full description of the statistical parameters including central tendency (e.g. means) or other basic estimates (e.g. regression coefficient) AND variation (e.g. standard deviation) or associated estimates of uncertainty (e.g. confidence intervals) |
| <input type="checkbox"/>            | <input checked="" type="checkbox"/> For null hypothesis testing, the test statistic (e.g. $F$ , $t$ , $r$ ) with confidence intervals, effect sizes, degrees of freedom and $P$ value noted<br><i>Give <math>P</math> values as exact values whenever suitable.</i>                            |
| <input checked="" type="checkbox"/> | <input type="checkbox"/> For Bayesian analysis, information on the choice of priors and Markov chain Monte Carlo settings                                                                                                                                                                      |
| <input checked="" type="checkbox"/> | <input type="checkbox"/> For hierarchical and complex designs, identification of the appropriate level for tests and full reporting of outcomes                                                                                                                                                |
| <input type="checkbox"/>            | <input checked="" type="checkbox"/> Estimates of effect sizes (e.g. Cohen's $d$ , Pearson's $r$ ), indicating how they were calculated                                                                                                                                                         |

*Our web collection on [statistics for biologists](#) contains articles on many of the points above.*

### Software and code

Policy information about [availability of computer code](#)

|                 |                                                                                                                                                                                                                                                                                                                                                                                                                                                                                                                                                                                                                                                                                                                                                                                                                                                                                                                                                                                                            |
|-----------------|------------------------------------------------------------------------------------------------------------------------------------------------------------------------------------------------------------------------------------------------------------------------------------------------------------------------------------------------------------------------------------------------------------------------------------------------------------------------------------------------------------------------------------------------------------------------------------------------------------------------------------------------------------------------------------------------------------------------------------------------------------------------------------------------------------------------------------------------------------------------------------------------------------------------------------------------------------------------------------------------------------|
| Data collection | no software used for data collection                                                                                                                                                                                                                                                                                                                                                                                                                                                                                                                                                                                                                                                                                                                                                                                                                                                                                                                                                                       |
| Data analysis   | <p>Cellranger-4.0.0 was used for alignment of sequence reads<br/>           Seurat v4.2.0 and scRepertoire v1.7.2 was used for single cell RNA seq data analysis<br/>           TCR reconstruction was done using a custom script: TCRgen_mouse.opt_v2.py and imgt_tcr_mouse.nuc.fa<br/>           SABR library design was done using a custom script: backtranslate_fast_noU_upto25.py<br/>           SABR screen data were analyzed using demultiplex_dual.py; epitope_extract_fastq_v1.1.py; merge_counts_split_v2.1.py<br/>           All the custom scripts and an R-studio (version 2023.12.1+402) notebook describing the scRNAseq analysis are deposited on Github:<br/> <a href="https://github.com/joglekar-lab/SABR-II">https://github.com/joglekar-lab/SABR-II</a><br/>           The code availability statement is included in the manuscript.</p> <p>Graphpad Prism v9 and v10 were used for data analysis.</p> <p>CoNGA, tcrdist3, GLIPH2 were used as per the published instructions.</p> |

For manuscripts utilizing custom algorithms or software that are central to the research but not yet described in published literature, software must be made available to editors and reviewers. We strongly encourage code deposition in a community repository (e.g. GitHub). See the Nature Portfolio [guidelines for submitting code & software](#) for further information.

## Data

Policy information about [availability of data](#)

All manuscripts must include a [data availability statement](#). This statement should provide the following information, where applicable:

- Accession codes, unique identifiers, or web links for publicly available datasets
- A description of any restrictions on data availability
- For clinical datasets or third party data, please ensure that the statement adheres to our [policy](#)

Single cell RNA sequencing data are publicly available on Gene Expression Omnibus (Accession: GSE247410)

Mouse genome GRCm39 was used for alignment of scRNAseq data ([https://www.ncbi.nlm.nih.gov/datasets/genome/GCF\\_000001635.20/](https://www.ncbi.nlm.nih.gov/datasets/genome/GCF_000001635.20/))

TCR sequences and epitope sequences are available as supplementary data files and their details are included in the manuscript at the appropriate places.

## Human research participants

Policy information about [studies involving human research participants and Sex and Gender in Research](#).

|                             |                                  |
|-----------------------------|----------------------------------|
| Reporting on sex and gender | <input type="text" value="N/A"/> |
| Population characteristics  | <input type="text" value="N/A"/> |
| Recruitment                 | <input type="text" value="N/A"/> |
| Ethics oversight            | <input type="text" value="N/A"/> |

Note that full information on the approval of the study protocol must also be provided in the manuscript.

## Field-specific reporting

Please select the one below that is the best fit for your research. If you are not sure, read the appropriate sections before making your selection.

Life sciences       Behavioural & social sciences       Ecological, evolutionary & environmental sciences

For a reference copy of the document with all sections, see [nature.com/documents/nr-reporting-summary-flat.pdf](https://www.nature.com/documents/nr-reporting-summary-flat.pdf)

## Life sciences study design

All studies must disclose on these points even when the disclosure is negative.

|                 |                                                                                                                                                                                                                                             |
|-----------------|---------------------------------------------------------------------------------------------------------------------------------------------------------------------------------------------------------------------------------------------|
| Sample size     | <input type="text" value="A sample size of 40 TCRs was chosen arbitrarily based on the expansion size"/>                                                                                                                                    |
| Data exclusions | <input type="text" value="None"/>                                                                                                                                                                                                           |
| Replication     | <input type="text" value="3 biological replicates were done for validation assays&lt;br/&gt;3 technical replicates were done for each SABR-II screen and averaged for a given TCR&lt;br/&gt;All attempts at replication were successful."/> |
| Randomization   | <input type="text" value="Randomization was not relevant to the study, as each TCR was screened independently of others."/>                                                                                                                 |
| Blinding        | <input type="text" value="Blinding was not performed, because the specificity of a given TCR is not known a priori. As each TCR is screened independently of other TCRs, no blinding was required."/>                                       |

## Reporting for specific materials, systems and methods

We require information from authors about some types of materials, experimental systems and methods used in many studies. Here, indicate whether each material, system or method listed is relevant to your study. If you are not sure if a list item applies to your research, read the appropriate section before selecting a response.

## Materials &amp; experimental systems

## Methods

| n/a                                 | Involvement                                                     |
|-------------------------------------|-----------------------------------------------------------------|
| <input type="checkbox"/>            | <input checked="" type="checkbox"/> Antibodies                  |
| <input type="checkbox"/>            | <input checked="" type="checkbox"/> Eukaryotic cell lines       |
| <input checked="" type="checkbox"/> | <input type="checkbox"/> Palaeontology and archaeology          |
| <input type="checkbox"/>            | <input checked="" type="checkbox"/> Animals and other organisms |
| <input checked="" type="checkbox"/> | <input type="checkbox"/> Clinical data                          |
| <input checked="" type="checkbox"/> | <input type="checkbox"/> Dual use research of concern           |

| n/a                                 | Involvement                                        |
|-------------------------------------|----------------------------------------------------|
| <input checked="" type="checkbox"/> | <input type="checkbox"/> ChIP-seq                  |
| <input type="checkbox"/>            | <input checked="" type="checkbox"/> Flow cytometry |
| <input checked="" type="checkbox"/> | <input type="checkbox"/> MRI-based neuroimaging    |

## Antibodies

## Antibodies used

Anti-mouse TCRbeta PE, Clone H57-597; 109208 (Biolegend)  
 Anti-rat RT1B, PE, Clone OX-6; 205308 (Biolegend)  
 Anti-mouse I-A/I-E APC-Cy7, Clone M5/114.15.2; 107628 (Biolegend)  
 Anti-human CD69 APC-Cy7 (Clone FN50) :310914 (Biolegend)  
 Anti-mouse CD25, APC-Cy7, Clone PC61: 102025 (Biolegend)  
 Anti mouse Thy1.2, BV605; 105343 (Biolegend)  
 TotalSeq™-C0301 anti-mouse Hashtag Antibody, Clone M1/42; 30-F11; Tag # 1-10 ;155861-155879 (Biolegend)  
 Anti-human Fas, APC-Cy7 (Clone DX2); 305635 (Biolegend)  
 Ultra-LEAF Anti-mouse CD3 (Clone 145-2C11 ); 100340 (Biolegend)  
 Ultra-LEAF Anti-mouse CD28 (Clone 37.51); 102116 (Biolegend)

## Validation

All antibodies were obtained from commercial vendors and were validated by the vendors prior to us purchasing them.

Anti-mouse TCRbeta PE, Clone H57-597; 109208 (Biolegend)  
<https://d1spbj2x7qk4bg.cloudfront.net/Default.aspx?ID=13064&pdf=true&displayInline=true&ProductID=272&leftRightMargin=15&topBottomMargin=15&filename=PE%20anti-mouse%20TCR%20CE%20chain%20Antibody.pdf&v=20240208073156>

Anti-rat RT1B, PE, Clone OX-6; 205308 (Biolegend)  
<https://d1spbj2x7qk4bg.cloudfront.net/Default.aspx?ID=13064&pdf=true&displayInline=true&ProductID=5725&leftRightMargin=15&topBottomMargin=15&filename=PE%20anti-rat%20RT1B%20Antibody.pdf&v=20231114073227>

Anti-mouse I-A/I-E APC-Cy7, Clone M5/114.15.2; 107628 (Biolegend)  
<https://d1spbj2x7qk4bg.cloudfront.net/Default.aspx?ID=13064&pdf=true&displayInline=true&ProductID=5966&leftRightMargin=15&topBottomMargin=15&filename=APC/Cyanine7%20anti-mouse%20I-A/I-E%20Antibody.pdf&v=20240207103033>

Anti-human CD69 APC-Cy7 (Clone FN50) :310914 (Biolegend)  
<https://d1spbj2x7qk4bg.cloudfront.net/Default.aspx?ID=13064&pdf=true&displayInline=true&ProductID=1917&leftRightMargin=15&topBottomMargin=15&filename=APC/Cyanine7%20anti-human%20CD69%20Antibody.pdf&v=20240207043300>

Anti-mouse CD25, APC-Cy7, Clone PC61: 102025 (Biolegend)  
<https://d1spbj2x7qk4bg.cloudfront.net/Default.aspx?ID=13064&pdf=true&displayInline=true&ProductID=3902&leftRightMargin=15&topBottomMargin=15&filename=APC/Cyanine7%20anti-mouse%20CD25%20Antibody.pdf&v=20240207103033>

Anti mouse Thy1.2, BV605; 105343 (Biolegend)  
[https://d1spbj2x7qk4bg.cloudfront.net/Default.aspx?ID=13064&pdf=true&displayInline=true&ProductID=13864&leftRightMargin=15&topBottomMargin=15&filename=Brilliant%20Violet%20605%E2%84%A2%20anti-mouse%20CD90.2%20\(Thy1.2\)%20Antibody.pdf&v=20240106073142](https://d1spbj2x7qk4bg.cloudfront.net/Default.aspx?ID=13064&pdf=true&displayInline=true&ProductID=13864&leftRightMargin=15&topBottomMargin=15&filename=Brilliant%20Violet%20605%E2%84%A2%20anti-mouse%20CD90.2%20(Thy1.2)%20Antibody.pdf&v=20240106073142)

TotalSeq™-C0301 anti-mouse Hashtag Antibody, Clone M1/42; 30-F11; Tag # 1-10 ;155861-155879 (Biolegend)  
<https://d1spbj2x7qk4bg.cloudfront.net/Default.aspx?ID=13064&pdf=true&displayInline=true&ProductID=18447&leftRightMargin=15&topBottomMargin=15&filename=TotalSeq%E2%84%A2-C0310%20anti-mouse%20Hashtag%2010%20Antibody.pdf&v=20240208073156>

Anti-human Fas, APC-Cy7 (Clone DX2); 305635 (Biolegend)  
[https://d1spbj2x7qk4bg.cloudfront.net/Default.aspx?ID=13064&pdf=true&displayInline=true&ProductID=12141&leftRightMargin=15&topBottomMargin=15&filename=APC/Cyanine7%20anti-human%20CD95%20\(Fas\)%20Antibody.pdf&v=20240208073156](https://d1spbj2x7qk4bg.cloudfront.net/Default.aspx?ID=13064&pdf=true&displayInline=true&ProductID=12141&leftRightMargin=15&topBottomMargin=15&filename=APC/Cyanine7%20anti-human%20CD95%20(Fas)%20Antibody.pdf&v=20240208073156)

Ultra-LEAF Anti-mouse CD3 (Clone 145-2C11 ); 100340 (Biolegend)  
<https://d1spbj2x7qk4bg.cloudfront.net/Default.aspx?ID=13064&pdf=true&displayInline=true&ProductID=7722&leftRightMargin=15&topBottomMargin=15&filename=Ultra-LEAF%E2%84%A2%20Purified%20anti-mouse%20CD3%CE%B5%20Antibody.pdf&v=20240208073156>

Ultra-LEAF Anti-mouse CD28 (Clone 37.51); 102116 (Biolegend)

## Eukaryotic cell lines

Policy information about [cell lines and Sex and Gender in Research](#)

|                                                                      |                                                                                                                                                                                                                                                                                                                    |
|----------------------------------------------------------------------|--------------------------------------------------------------------------------------------------------------------------------------------------------------------------------------------------------------------------------------------------------------------------------------------------------------------|
| Cell line source(s)                                                  | Phoenix Eco Cells; CRL-3214; ATCC<br>HEK-293T CRL-3216; ATCC<br>Jurkat cells TIB-152; ATCC<br>Daudi cells CCL-213; ATCC<br>5KC cells: Nakayama Lab, Barbara Davis Center for Diabetes, University of Colorado Anschutz Medical Campus<br>NFAT-GFP-Jurkat cells: Weiss Lab, University of California, San Francisco |
| Authentication                                                       | None                                                                                                                                                                                                                                                                                                               |
| Mycoplasma contamination                                             | Mycoplasma negative by Hoescht Staining                                                                                                                                                                                                                                                                            |
| Commonly misidentified lines<br>(See <a href="#">ICLAC</a> register) | None                                                                                                                                                                                                                                                                                                               |

## Animals and other research organisms

Policy information about [studies involving animals](#); [ARRIVE guidelines](#) recommended for reporting animal research, and [Sex and Gender in Research](#)

|                         |                                                                                                                                                                                                                                                                                                         |
|-------------------------|---------------------------------------------------------------------------------------------------------------------------------------------------------------------------------------------------------------------------------------------------------------------------------------------------------|
| Laboratory animals      | NOD/ShiLtJ; 001976; The Jackson Laboratory<br>Age 4-10 weeks, Sex: female<br>Mice were housed in microisolator cages with upto 5 mice per cage; 14-hour light/10-hour dark cycle was used. Temperatures of 65-75°F (~18-23°C) with 40-60% humidity were maintained. There was constant access to water. |
| Wild animals            | No wild animals were used in this study                                                                                                                                                                                                                                                                 |
| Reporting on sex        | Female NOD mice are much more prone to T1D, therefore female mice were used for single cell RNA sequencing.                                                                                                                                                                                             |
| Field-collected samples | No field collected samples were not used in this study                                                                                                                                                                                                                                                  |
| Ethics oversight        | Animal research was approved by the IACUC at University of Pittsburgh. The full information on the protocol is added to the manuscript                                                                                                                                                                  |

Note that full information on the approval of the study protocol must also be provided in the manuscript.

## Flow Cytometry

### Plots

Confirm that:

- The axis labels state the marker and fluorochrome used (e.g. CD4-FITC).
- The axis scales are clearly visible. Include numbers along axes only for bottom left plot of group (a 'group' is an analysis of identical markers).
- All plots are contour plots with outliers or pseudocolor plots.
- A numerical value for number of cells or percentage (with statistics) is provided.

### Methodology

|                           |                                                                                                                                                                                                                          |
|---------------------------|--------------------------------------------------------------------------------------------------------------------------------------------------------------------------------------------------------------------------|
| Sample preparation        | Cells were harvested by centrifugation, resuspended in PBS + 2% FBS and stained with antibody mixes for 20 min at 4 deg celcius. After 20 min, cells were washed 2x with PBS + 2% FBS and filtered before flow cytometry |
| Instrument                | Attune NxT with CytKickMax was used for analytical flow cytometry. BD Aria was used for sorting cells                                                                                                                    |
| Software                  | Manufacturer's default software was used, Analysis was done in Flowjo v10                                                                                                                                                |
| Cell population abundance | Individual experiments ranged in their purity as indicated in supplementary figures.                                                                                                                                     |
| Gating strategy           | The gating strategy for analytical flow cytometry: Gate on FSC/SSC for lymphocytes; SSC-A vs SSC-H for singlets, and individual stains were gated based on negative controls                                             |

- Tick this box to confirm that a figure exemplifying the gating strategy is provided in the Supplementary Information.
